# Supplementary material
Source: PubMed Central journal article supplement (PMC1941830)

**Thr132****Trp133****Thr134****Ala135****Ala136****Asp137****Met138****Ala139****Ala140**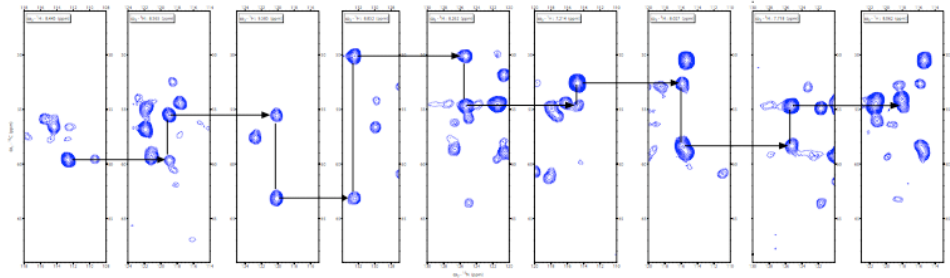

Supplement: pnas_0703702104_1.pdf [file pnas_0703702104_1.pdf]

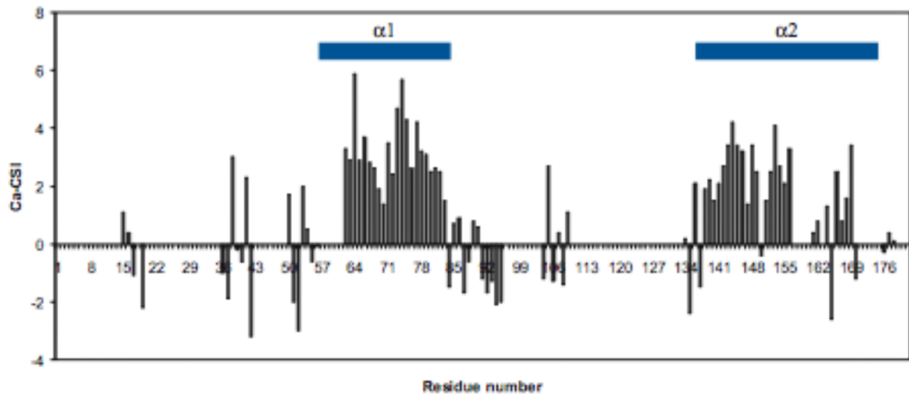

Supplement: pnas_0703702104_3.pdf [file pnas_0703702104_3.pdf]
